# Supplementary material for: Binding of halogens by a Cr8 metallacrown
Source: Royal Society of Chemistry journal article supplement (doi:10.1039/c8dt03172j), 2018-01-01
Supplement: c8dt03172j1.pdf [file c8dt03172j1.pdf]

Supplementary Information

## **Reversible uptake of halogens ( $X_2=Cl_2$ , $Br_2$ and $I_2$ ) by $Cr_8$ metallocrown**

Daniel Florin Sava, Nan Zheng, Iñigo J. Vitórica-Yrezábal, Grigore A. Timco, and Richard E.P. Winpenny\*

|                                                  |           |
|--------------------------------------------------|-----------|
| <b>S1. Synthesis.....</b>                        | <b>1</b>  |
| <b>S2. Thermogravimetric analysis.....</b>       | <b>2</b>  |
| <b>S3. Raman Spectra.....</b>                    | <b>5</b>  |
| <b>S4. DSC Analysis.....</b>                     | <b>6</b>  |
| <b>S5. Single crystal X-ray diffraction.....</b> | <b>8</b>  |
| <b>S6. References.....</b>                       | <b>13</b> |

## S1. Synthesis

### Synthetic details

Unless stated otherwise, all reagents and solvents were purchased from Sigma Aldrich Chemicals and used without further purification.

Synthesis of  $[\text{Cr}_8(\mu\text{-F})_8(\text{O}_2\text{C}^t\text{Bu})_{16}]$  (**Cr<sub>8</sub>**) with empty cavity was reported in a previous study.<sup>1</sup> All the **Cr<sub>8</sub>** crystals used in these experiments are from the same batch. ESI-MS (m/z): + 2207  $[\text{M} + \text{Na}]^+$  (100%); Elem. Anal. (calc./exp.): C (43.96/44.07), H (6.64/6.68) and Cr (19.03/19.05).

Synthesis of  $[\text{Cr}_8(\mu\text{-F})_8(\text{O}_2\text{C}^t\text{Bu})_{16}] \cdot 0.743(5) \text{Cl}_2 - \text{Cl}_2@ \text{Cr}_8$ .

Dry  $\text{Cl}_2$  gas was introduced in a conical flask that contained single crystals of **1** at 290K. Chlorine gas was produced by adding acidic water drop-wise in a round-bottom flask with trichloroisocyanuric acid. The produced gas flows through a silicon tube in a drying column and then in the conical flask containing **Cr<sub>8</sub>**. Elem. Anal.  $\text{Cr}_8\text{F}_8\text{O}_{32}\text{C}_{80}\text{H}_{144}\text{Cl}_{1.486}$  (calc./exp.): C (42.94/43.35), H (6.49/6.59), Cl (2.36/2.24) and Cr (18.59/18.24). TGA – loses 3.5760% between 45.18 and 284.20°C which corresponds to 1.141  $\text{Cl}_2$  molecules.

Synthesis of  $[\text{Cr}_8(\mu\text{-F})_8(\text{O}_2\text{C}^t\text{Bu})_{16}] \cdot 0.8017(18) \text{Br}_2 - \text{Br}_2@ \text{Cr}_8$

Liquid  $\text{Br}_2$  was put in a large vial, and then in the same vial a smaller vial that contained single crystals of **Cr<sub>8</sub>** was introduced at room temperature. The vial was left sealed overnight and the next the crystals were measured. Elem. Anal.  $\text{Cr}_8\text{F}_8\text{O}_{32}\text{C}_{80}\text{H}_{144}\text{Br}_{1.603}$  (calc./exp.): C (41.54/38.83), H (6.27/5.96), Br (5.55/9.16) and Cr (17.98/16.57). TGA – loses 7.1165% between 36.73 and 103.73°C corresponding to 1.097  $\text{Br}_2$  molecules and 4.2985 % between 109.36 and 166.02°C which corresponds to 0.663  $\text{Br}_2$  molecules a total of 1.766  $\text{Br}_2$  molecules.

The difference in the elemental analysis comes from the fact the calculations are done for the chemical formula obtained from the crystal data. If we were to re-calculate the percentages based upon the quantity of bromine extracted from TGA the percentages would be: Elem. Anal.  $\text{Cr}_8\text{F}_8\text{O}_{32}\text{C}_{80}\text{H}_{144}\text{Br}_{3.532}$  (calc./exp.): C (38.94/38.83), H (5.88/5.96), Br (11.45/9.16) and Cr (16.86/16.57).

Synthesis of  $[\text{Cr}_8(\mu\text{-F})_8(\text{O}_2\text{C}^t\text{Bu})_{16}] \cdot 0.38\text{I}_2 - \text{I}_2@ \text{Cr}_8$

$\text{I}_2$  was put in a screw-cap Teflon flask 125 mL volume, and then in the flask a vial that contained single crystals of **Cr<sub>8</sub>** was introduced. The vial was left sealed for 1 week at 50 °C and then the crystals were measured. Elem. Anal.  $\text{Cr}_8\text{F}_8\text{O}_{32}\text{C}_{80}\text{H}_{144}\text{I}_{1.603}$  (calc./exp.): C (42.11/42.74), H (6.36/6.49), I (4.23/3.41) and Cr (18.23/17.83). TGA – loses 3.7754% between 73.50 and 273.21°C which corresponds to 0.34  $\text{I}_2$  molecules.

## S2. Thermogravimetric analysis

TGA analysis for compound  $\text{Cl}_2@\text{Cr}_8$ ,  $\text{Br}_2@\text{Cr}_8$  and  $\text{I}_2@\text{Cr}_8$  were done in a Perkin-Elmer instrument. The samples were heated at  $5^\circ\text{C}/\text{minute}$  from room temperature to  $600^\circ\text{C}$  under a flow of dry nitrogen gas.

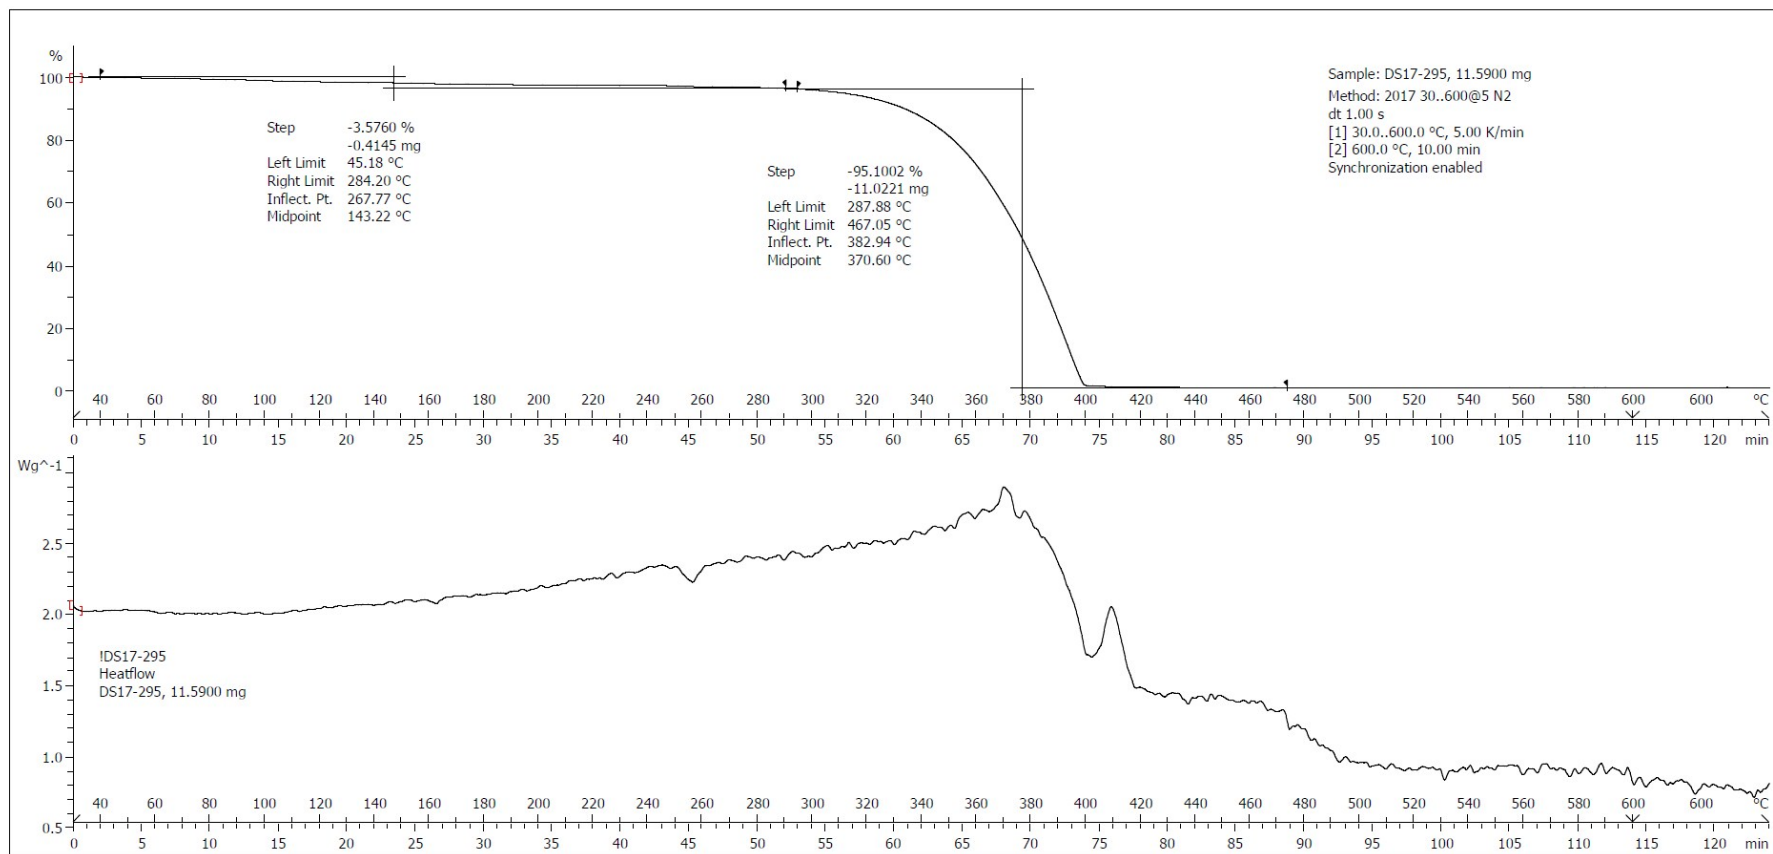

School of Chemistry Microanalysis Lab: METTLER

STAR® SW 10.00

Figure S1 – TGA of  $\text{Cl}_2@\text{Cr}_8$

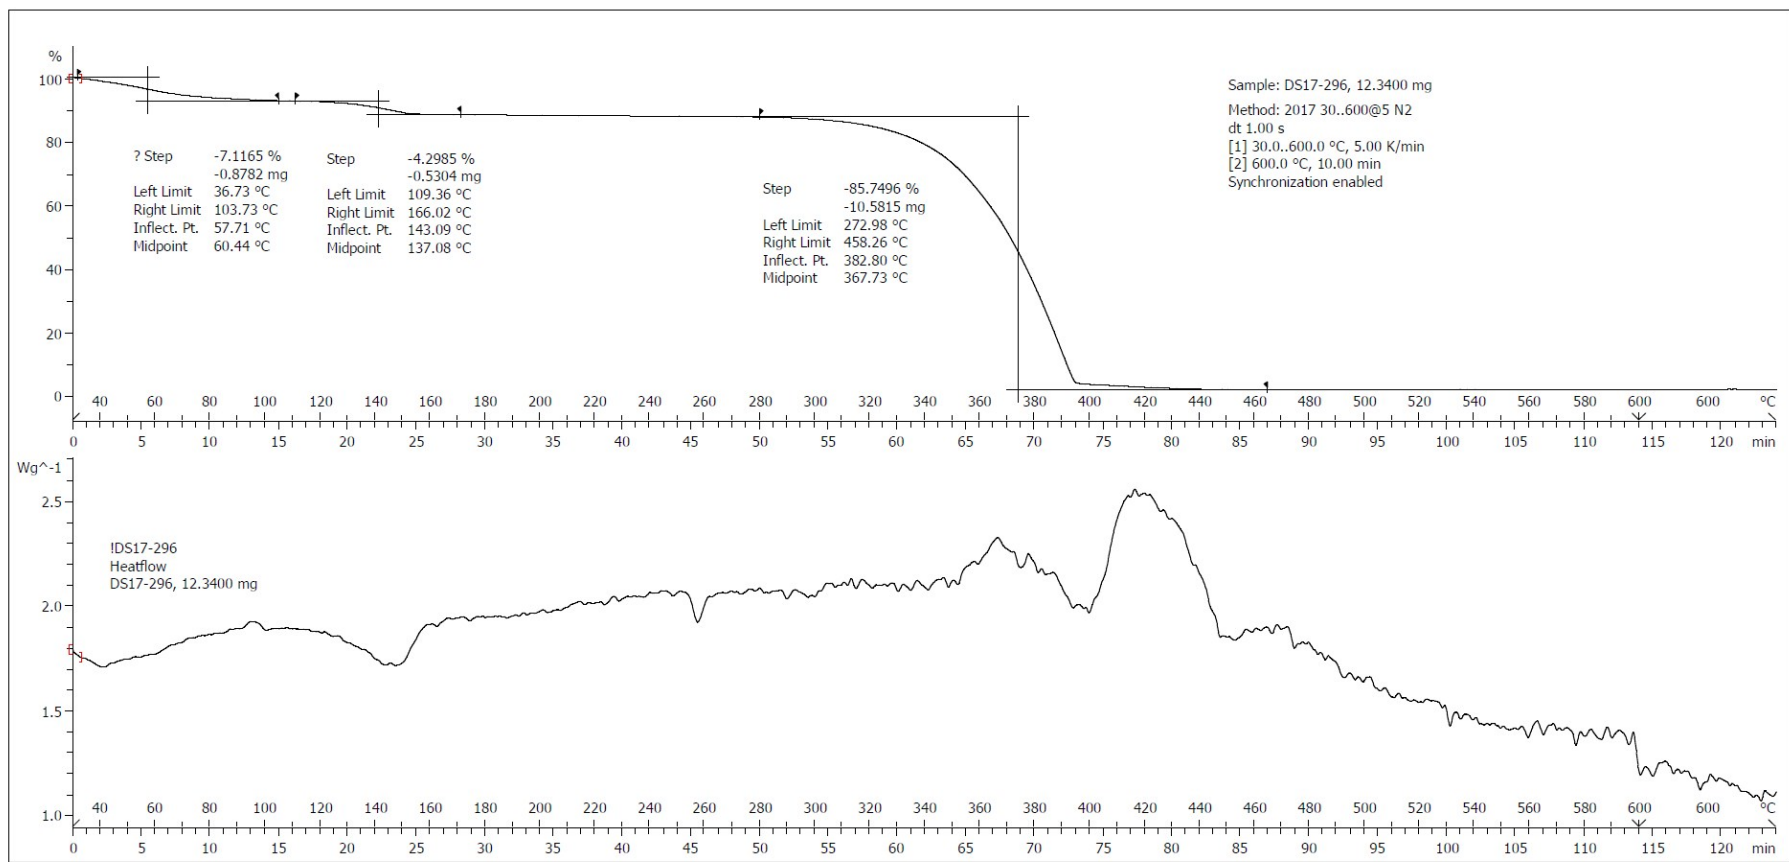

School of Chemistry Microanalysis Lab: METTLER

STAR® SW 10.00

Figure S2 – TGA of Br<sub>2</sub>@Cr<sub>8</sub>

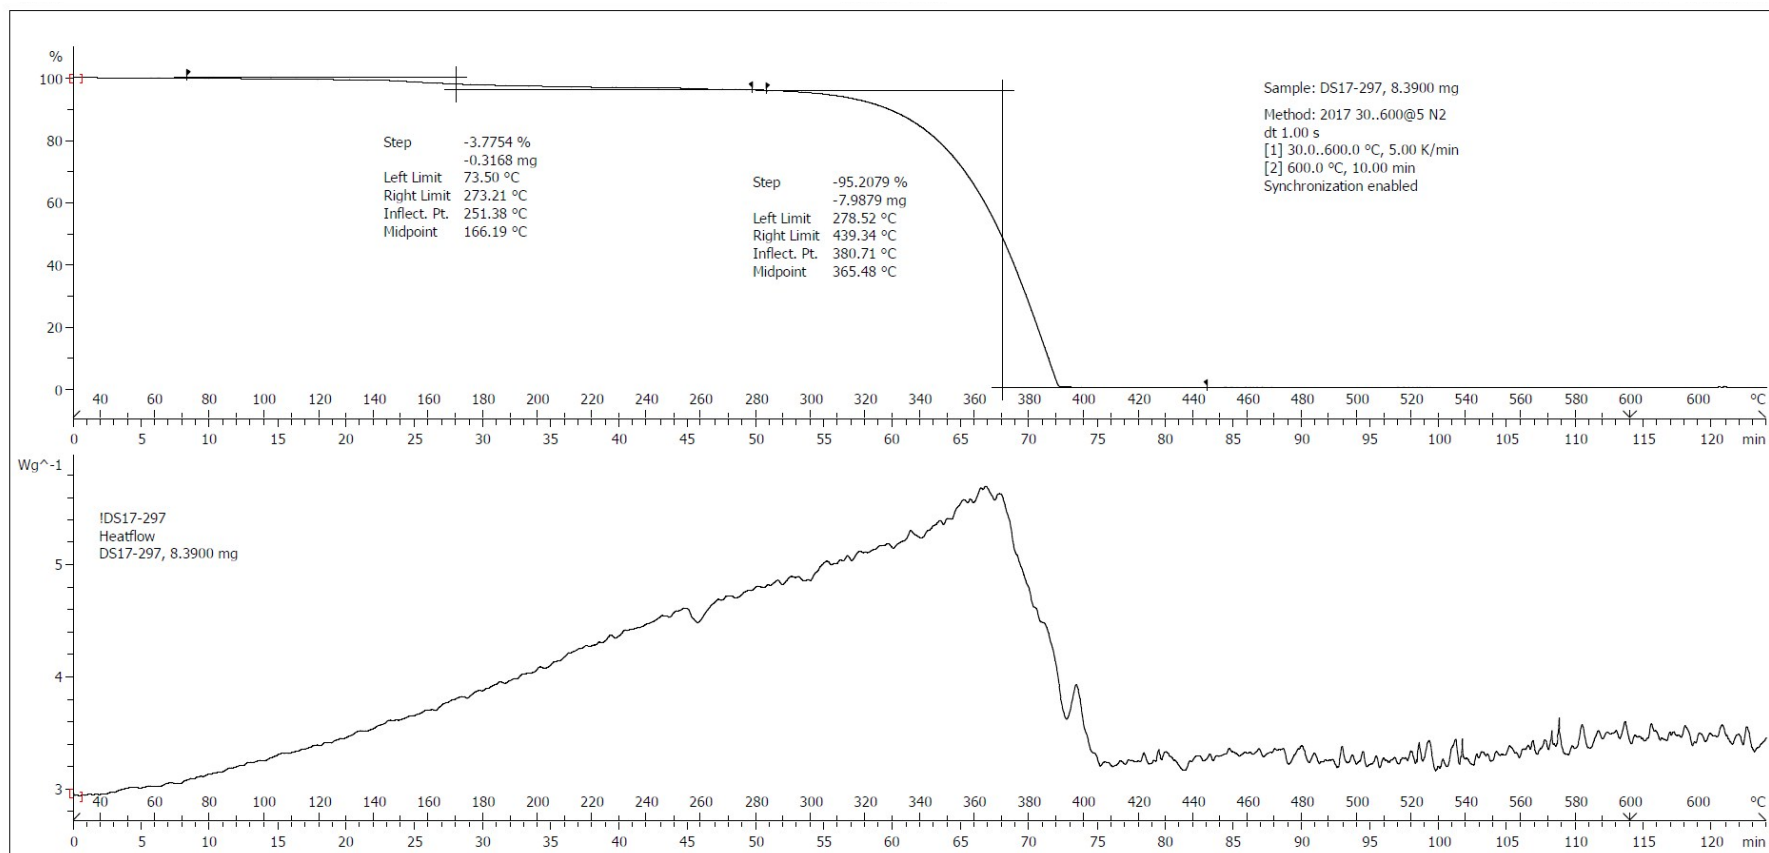

School of Chemistry Microanalysis Lab: METTLER

STAR® SW 10.00

Figure S3 – TGA of  $I_2@Cr_8$

### S3. RAMAN Spectra

RAMAN studies were carried out on a Renishaw System 1000 Raman Spectrometer including Modu-Laser 514nm. Each spectrum was obtained as static spectra centred at 520  $\text{cm}^{-1}$ , 100% laser power, 10s, Accumulation 5.

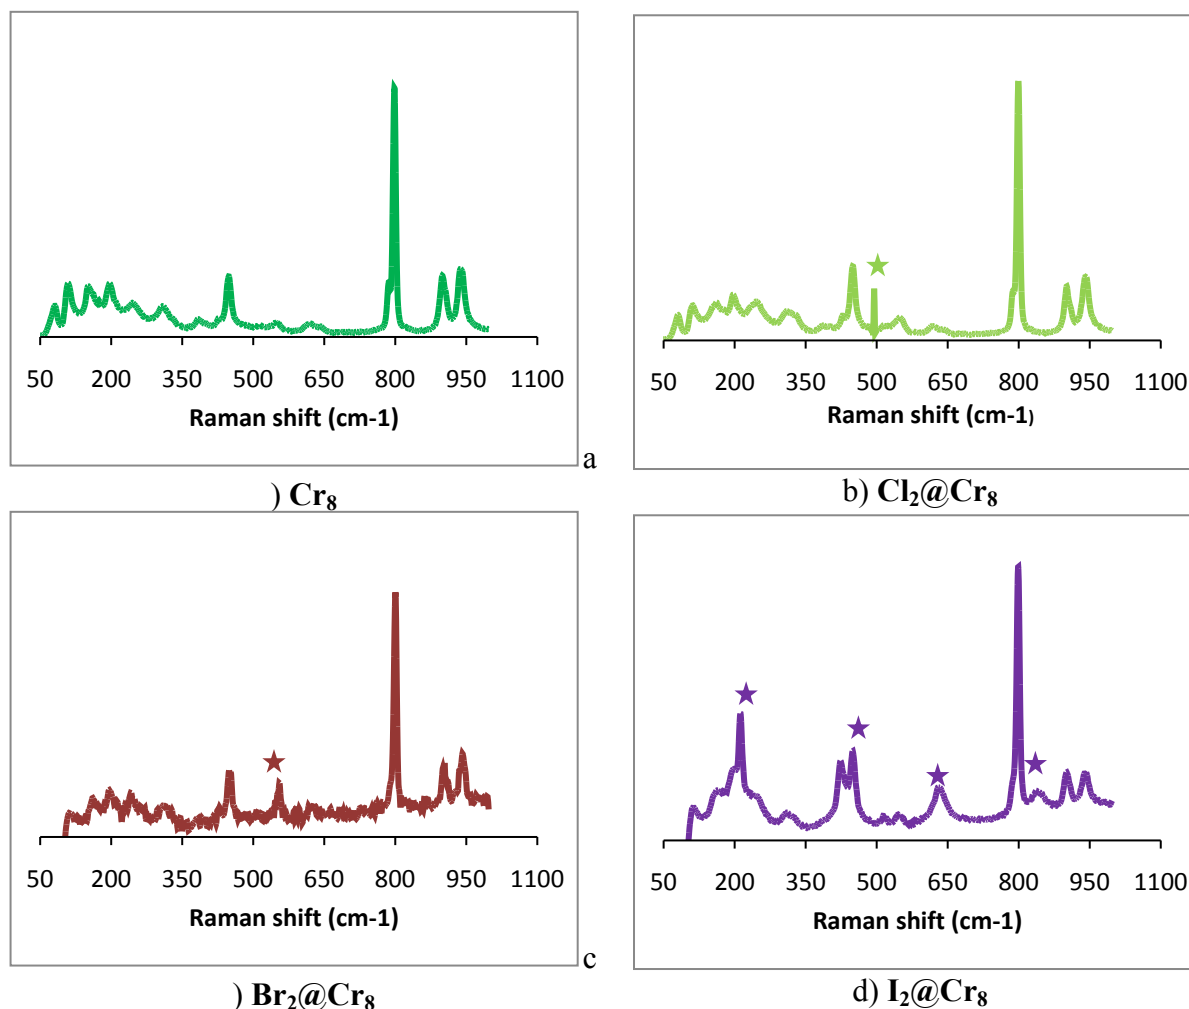

**Figure S4** – Raman spectra of a)  $\text{Cr}_8$ , b)  $\text{Cl}_2@Cr_8$ , c)  $\text{Br}_2@Cr_8$  and d)  $\text{I}_2@Cr_8$

All the peaks in the Raman spectra assigned to the halogen are red shifted compared to the Raman shifts from the gaseous halogens. The  $\nu_1$  mode moves to a lower wavenumber when the force constant is lowered. This happens when electron density is donated to an antibonding orbital, which is the exact case of the halogen bonds formed between the F and the gas halogens. The presence of Chlorine is depicted through the peak at 495  $\text{cm}^{-1}$  Raman shift which is red shifted from the  $\nu_1$  540  $\text{cm}^{-1}$  vibration for gaseous  $\text{Cl}_2$ .<sup>2</sup> In the case of the crystal loaded with Bromine, we cannot observe the  $\nu_1$  318  $\text{cm}^{-1}$  because of its overlap with the  $\text{Cr}_8$  vibration peaks. Nonetheless, we observe a peak at 554  $\text{cm}^{-1}$  Raman shift, also red-shifted from the  $2\nu_1$  611  $\text{cm}^{-1}$  vibration for gaseous  $\text{Br}_2$ .<sup>3</sup> In the case of Iodine loaded sample we observe a peak at 212  $\text{cm}^{-1}$ , very little red shifted from the  $\nu_1$  214.5  $\text{cm}^{-1}$  vibration of

gaseous I<sub>2</sub>. We also observe other different overtones of the iodine stretching vibrations at 422, 628 and 835 cm<sup>-1</sup>.<sup>4</sup>

### S4. DSC Analysis

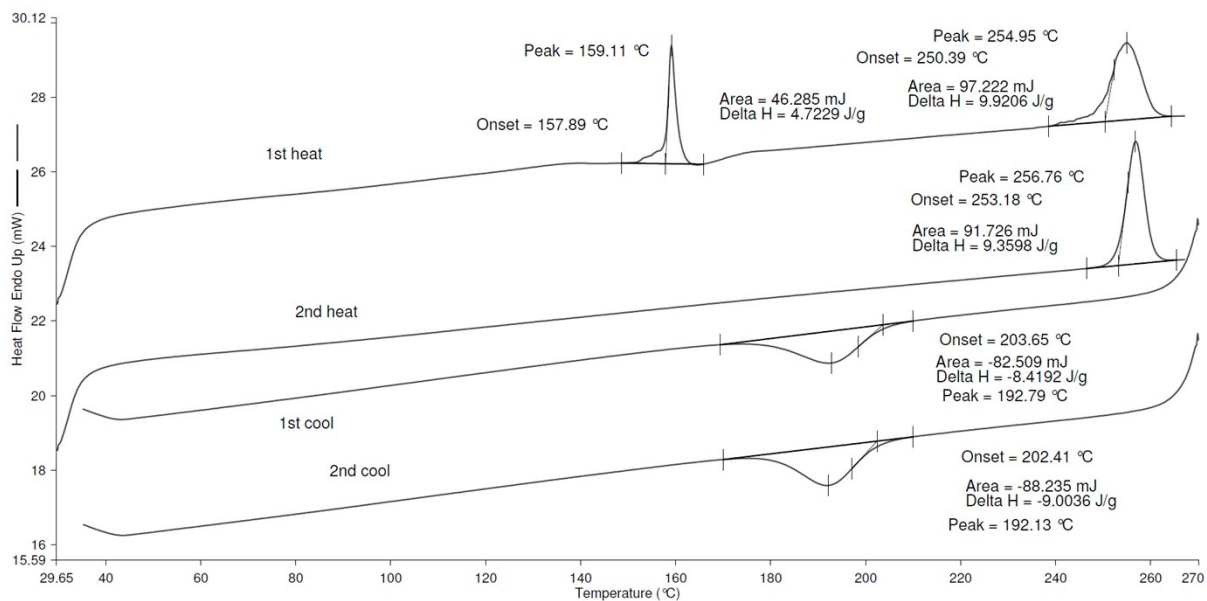

Figure S5 – DSC of Cl<sub>2</sub>@Cr<sub>8</sub>

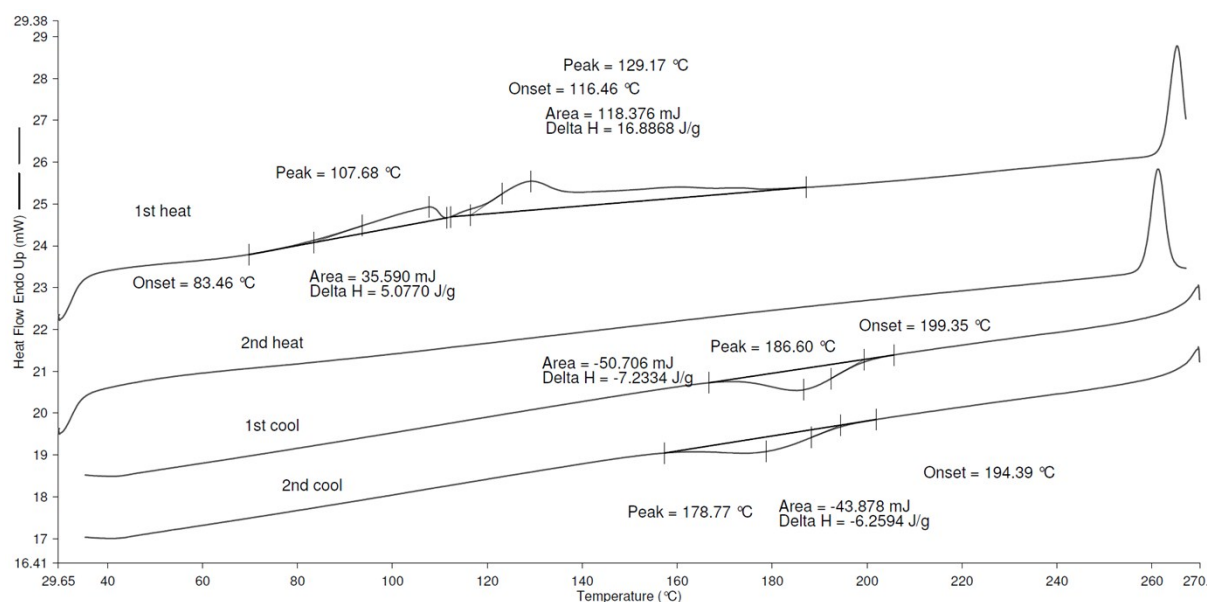

Figure S6 – DSC of Br<sub>2</sub>@Cr<sub>8</sub>

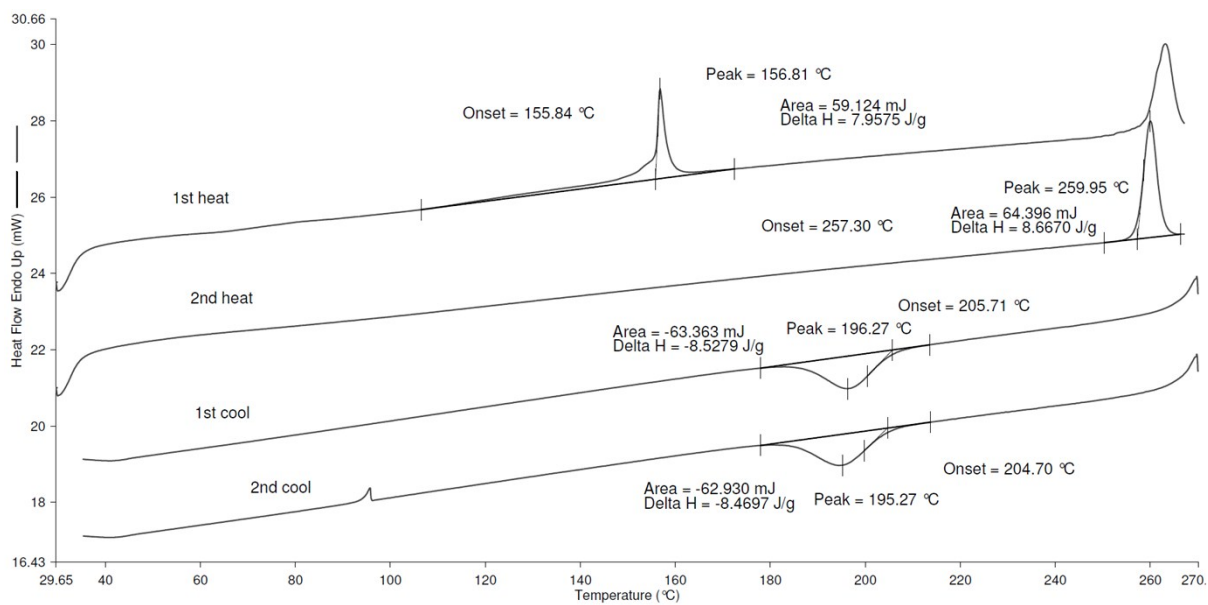

**Figure S7 – DSC of  $I_2@Cr_8$**



## S5. Single crystal X-ray diffraction

### Data Collection.

Single crystal X-ray diffraction data were collected for the crystal structures  $\text{Cl}_2@Cr_8$  and  $\text{Br}_2@Cr_8$  at a using Mo-K $\alpha$  radiation ( $\lambda = 0.71073 \text{ \AA}$ ) on an Agilent Supernova, equipped with an Oxford Cryosystems Cobra nitrogen flow gas system and

Single crystal X-ray diffraction data were collected for the crystal structures  $\text{I}_2@Cr_8$ ,  $\text{Cl}_2@Cr_8\_VT350K\_1-2$ ,  $\text{Br}_2@Cr_8\_VT350K\_1-3$ ,  $\text{I}_2@Cr_8\_VT350K\_1-7$  and  $\text{I}_2@Cr_8\_VT400K\_1-4$  on a Rigaku FR-X diffractometer with a HyPix 6000HE detector and microfocus optics with Mo K $\alpha$  radiation ( $\lambda = 0.71073 \text{ \AA}$ ). Data were measured using CrysAlisPro suite of programs.

VT350K – is a variable temperature experiment where Single crystal X-ray diffraction data were collected at 240 K, and then the crystal was heated up to 350K where it was kept for one hour, before the temperature was decreased at 200 K for another collection. (This cycles was repeated up to 6 times)

VT400K – is a variable temperature experiment where Single crystal X-ray diffraction data were collected at 240 K, and then the crystal was heated up to 400K where it was kept for three hours, before the temperature was decreased at 200 K for another collection.

### Crystal structure determinations and refinements.

X-ray data were processed and reduced using CrysAlisPro suite of programs for crystals. Absorption correction was performed using empirical methods based upon symmetry-equivalent reflections combined with measurements at different azimuthal angles using SCALE3 ABSPACK. The crystal structures were solved and refined against all  $F^2$  values using the SHELX and Olex2 suite of programs<sup>5, 6</sup>. All the non-hydrogen atoms were refined anisotropically. Hydrogen atoms were placed in calculated positions and refined using idealized geometries (riding model) and assigned fixed isotropic displacement parameters. Pivalate ligands in all the crystal structures were disordered and modelled over two positions where possible. SHELX SADI, and DFIX commands were used to restrain the C-C bonds. SIMU, ISOR and RIGU commands were used to restrain the atomic displacement parameters. Halogens were modelled as disordered over 2 to 4 position. SHELX SADI, and DFIX commands were used to restrain the halogen-halogen bonds. SIMU commands were used to restrain the atomic displacement parameters of the halogens.

CCDC 1859929-1859947 contains the supplementary crystallographic data for this paper. These data can be obtained free of charge via [www.ccdc.cam.ac.uk/conts/retrieving.html](http://www.ccdc.cam.ac.uk/conts/retrieving.html) (or from the Cambridge Crystallographic Data Centre, 12 Union Road, Cambridge CB21EZ, UK; fax: (+44)1223-336-033; or [deposit@ccdc.cam.ac.uk](mailto:deposit@ccdc.cam.ac.uk)). Diamond and POV-Ray software packages were used for graphical images.

**Table S1.** Crystallographic information for **Cl<sub>2</sub>@Cr<sub>8</sub>**, **Br<sub>2</sub>@Cr<sub>8</sub>** and **I<sub>2</sub>@Cr<sub>8</sub>**

|                                                                  | <b>Cl<sub>2</sub>@Cr<sub>8</sub></b>   | <b>Br<sub>2</sub>@Cr<sub>8</sub></b>   | <b>I<sub>2</sub>@Cr<sub>8</sub></b>    |
|------------------------------------------------------------------|----------------------------------------|----------------------------------------|----------------------------------------|
| Crystal colour                                                   | Dark green                             | Dark green                             | Dark green                             |
| Crystal size (mm)                                                | 0.4 × 0.2 × 0.1                        | 0.4 × 0.2 × 0.1                        | 0.4 × 0.05 × 0.05                      |
| Crystal system                                                   | monoclinic                             | monoclinic                             | monoclinic                             |
| Space group, <i>Z</i>                                            | I2/a                                   | I2/a                                   | I2/a                                   |
| <i>a</i> (Å)                                                     | 34.8424(9)                             | 44.1693(11)                            | 34.7598(3)                             |
| <i>b</i> (Å)                                                     | 16.5213(3)                             | 16.5140(3)                             | 16.47840(10)                           |
| <i>c</i> (Å)                                                     | 44.0605(19)                            | 34.8521(10)                            | 43.8863(4)                             |
| β (°)                                                            | 111.359(4)                             | 111.369(3)                             | 111.2800(10)                           |
| <i>V</i> (Å <sup>3</sup> )                                       | 23621.0(14)                            | 23673.9(11)                            | 23423.5(4)                             |
| Density (Mg.m <sup>-3</sup> )                                    | 1.259                                  | 1.298                                  | 1.294                                  |
| Wavelength (Å)                                                   | MoKα (λ = 0.71073)                     | MoKα (λ = 0.71073)                     | CuKα (λ = 1.54184)                     |
| Temperature (K)                                                  | 149.9(5)                               | 150.02(11)                             | 100.01(10)                             |
| μ (mm <sup>-1</sup> )                                            | 0.817                                  | 1.322                                  | 8.110                                  |
| 2θ range (°)                                                     | 6.784 to 52.744                        | 6.562 to 50.7                          | 5.456 to 140.15                        |
| Reflns collected                                                 | 49902                                  | 83715                                  | 82510                                  |
| Independent reflns ( <i>R</i> <sub>int</sub> )                   | 24024 [Rint = 0.0240, Rsigma = 0.0369] | 21611 [Rint = 0.0579, Rsigma = 0.0564] | 22150 [Rint = 0.0418, Rsigma = 0.0424] |
| L.S. parameters, <i>p</i>                                        | 1331                                   | 1425                                   | 1322                                   |
| No. of restraints, <i>r</i>                                      | 397                                    | 612                                    | 354                                    |
| <i>R</i> 1 ( <i>F</i> ) <sup>a</sup> <i>I</i> > 2.0σ( <i>I</i> ) | 0.0471                                 | 0.0472                                 | 0.0487                                 |
| <i>wR</i> 2( <i>F</i> <sup>2</sup> ), <sup>b</sup> all data      | 0.1324                                 | 0.1194                                 | 0.1369                                 |
| <i>S</i> ( <i>F</i> <sup>2</sup> ), <sup>c</sup> all data        | 1.022                                  | 1.016                                  | 1.047                                  |

<sup>a</sup>  $R1(F) = \sum(|F_o| - |F_c|)/\sum|F_o|$ ; [b]  $wR2(F^2) = [\sum w(F_o^2 - F_c^2)^2/\sum wF_o^4]^{1/2}$ ; [c]  $S(F^2) = [\sum w(F_o^2 - F_c^2)^2/(n + r - p)]^{1/2}$

**Table S2.** Crystallographic information for **Cl<sub>2</sub>@Cr<sub>8</sub>\_VT350K\_1-2**, **Br<sub>2</sub>@Cr<sub>8</sub>\_VT350K\_1-3**

|                                                                           | Cl <sub>2</sub> @Cr <sub>8</sub> _VT350K_1 | Cl <sub>2</sub> @Cr <sub>8</sub> _VT350K_2 | Br <sub>2</sub> @Cr <sub>8</sub> _VT350K_1 | Br <sub>2</sub> @Cr <sub>8</sub> _VT350K_2 | Br <sub>2</sub> @Cr <sub>8</sub> _VT350K_3 |
|---------------------------------------------------------------------------|--------------------------------------------|--------------------------------------------|--------------------------------------------|--------------------------------------------|--------------------------------------------|
| Crystal colour                                                            | Dark green                                 |
| Crystal size (mm)                                                         | 0.45 × 0.1 × 0.1                           | 0.45 × 0.1 × 0.1                           | 0.15 × 0.1 × 0.1                           | 0.15 × 0.1 × 0.1                           | 0.15 × 0.1 × 0.1                           |
| Crystal system                                                            | monoclinic                                 | monoclinic                                 | monoclinic                                 | monoclinic                                 | monoclinic                                 |
| Space group, <i>Z</i>                                                     | I2/a                                       | I2/a                                       | I2/a                                       | I2/a                                       | I2/a                                       |
| <i>a</i> (Å)                                                              | 34.7964(9)                                 | 34.7097(10)                                | 34.8657(8)                                 | 34.8212(8)                                 | 34.7987(8)                                 |
| <i>b</i> (Å)                                                              | 16.5728(3)                                 | 16.5768(3)                                 | 16.5762(3)                                 | 16.6141(3)                                 | 16.6176(3)                                 |
| <i>c</i> (Å)                                                              | 44.4195(13)                                | 44.5614(15)                                | 44.5490(12)                                | 44.6966(12)                                | 44.7185(12)                                |
| $\beta$ (°)                                                               | 111.368(3)                                 | 111.273(4)                                 | 111.427(3)                                 | 111.247(3)                                 | 111.180(3)                                 |
| <i>V</i> (Å <sup>3</sup> )                                                | 23854.7(11)                                | 23892.5(13)                                | 23967.2(11)                                | 24100.3(11)                                | 24112.6(11)                                |
| Density (Mg.m <sup>-3</sup> )                                             | 1.246                                      | 1.215                                      | 1.274                                      | 1.225                                      | 1.204                                      |
| Wavelength (Å)                                                            | MoK $\alpha$ ( $\lambda$ = 0.71073)        |
| Temperature (K)                                                           | 200.0                                      | 199.14(10)                                 | 200.0                                      | 200.0                                      | 200.0                                      |
| $\mu$ (mm <sup>-1</sup> )                                                 | 0.808                                      | 0.774                                      | 1.241                                      | 0.918                                      | 0.766                                      |
| 2 $\theta$ range (°)                                                      | 3.938 to 54.204                            | 3.834 to 54.206                            | 6.736 to 51.362                            | 6.782 to 51.364                            | 6.782 to 51.362                            |
| Reflns collected                                                          | 147914                                     | 147474                                     | 59591                                      | 60002                                      | 60001                                      |
| Independent reflns ( <i>R</i> <sub>int</sub> )                            | 26196 [Rint = 0.0451, Rsigma = 0.0356]     | 26283 [Rint = 0.0548, Rsigma = 0.0414]     | 22679 [Rint = 0.0345, Rsigma = 0.0524]     | 22815 [Rint = 0.0293, Rsigma = 0.0445]     | 22824 [Rint = 0.0293, Rsigma = 0.0450]     |
| L.S. parameters, <i>p</i>                                                 | 1499                                       | 1463                                       | 1539                                       | 1501                                       | 1463                                       |
| No. of restraints, <i>r</i>                                               | 1465                                       | 1602                                       | 1588                                       | 1627                                       | 1620                                       |
| <i>R</i> 1 ( <i>F</i> ) <sup>a</sup> <i>I</i> > 2.0 $\sigma$ ( <i>I</i> ) | 0.0586                                     | 0.0639                                     | 0.0609                                     | 0.0626                                     | 0.0692                                     |
| <i>wR</i> 2( <i>F</i> <sup>2</sup> ), <sup>b</sup> all data               | 0.1495                                     | 0.1714                                     | 0.1639                                     | 0.1706                                     | 0.2005                                     |
| <i>S</i> ( <i>F</i> <sup>2</sup> ), <sup>c</sup> all data                 | 1.024                                      | 1.027                                      | 1.024                                      | 1.018                                      | 1.014                                      |

<sup>a</sup>  $R1(F) = \sum(|F_o| - |F_c|)/\sum|F_o|$ ; [b]  $wR2(F^2) = [\sum w(F_o^2 - F_c^2)^2/\sum wF_o^4]^{1/2}$ ; [c]  $S(F^2) = [\sum w(F_o^2 - F_c^2)^2/(n + r - p)]^{1/2}$

**Table S3.** Crystallographic information for **I<sub>2</sub>@Cr<sub>8</sub>\_VT350K\_1-4**

|                                                                           | <b>I<sub>2</sub>@Cr<sub>8</sub>_VT350K_1</b> | <b>I<sub>2</sub>@Cr<sub>8</sub>_VT350K_2</b> | <b>I<sub>2</sub>@Cr<sub>8</sub>_VT350K_3</b> | <b>I<sub>2</sub>@Cr<sub>8</sub>_VT350K_4</b> |
|---------------------------------------------------------------------------|----------------------------------------------|----------------------------------------------|----------------------------------------------|----------------------------------------------|
| Crystal colour                                                            | Dark green                                   | Dark green                                   | Dark green                                   | Dark green                                   |
| Crystal size (mm)                                                         | 0.4 × 0.1 × 0.1                              | 0.4 × 0.1 × 0.1                              | 0.4 × 0.1 × 0.1                              | 0.4 × 0.1 × 0.1                              |
| Crystal system                                                            | monoclinic                                   | monoclinic                                   | monoclinic                                   | monoclinic                                   |
| Space group, <i>Z</i>                                                     | I2/a                                         | I2/a                                         | I2/a                                         | I2/a                                         |
| <i>a</i> (Å)                                                              | 34.7183(8)                                   | 44.5160(14)                                  | 34.6969(9)                                   | 34.6995(9)                                   |
| <i>b</i> (Å)                                                              | 16.5480(3)                                   | 16.5380(3)                                   | 16.5495(3)                                   | 16.5534(3)                                   |
| <i>c</i> (Å)                                                              | 44.5613(13)                                  | 34.6653(9)                                   | 44.5379(13)                                  | 44.5351(13)                                  |
| $\beta$ (°)                                                               | 111.390(3)                                   | 111.347(3)                                   | 111.304(3)                                   | 111.281(3)                                   |
| <i>V</i> (Å <sup>3</sup> )                                                | 23837.9(11)                                  | 23769.9(12)                                  | 23826.8(11)                                  | 23836.4(11)                                  |
| Density (Mg.m <sup>-3</sup> )                                             | 1.282                                        | 1.274                                        | 1.261                                        | 1.255                                        |
| Wavelength (Å)                                                            | MoK $\alpha$ ( $\lambda$ = 0.71073)          |
| Temperature (K)                                                           | 200.01(10)                                   | 200.0                                        | 200.0                                        | 198.94(10)                                   |
| $\mu$ (mm <sup>-1</sup> )                                                 | 1.011                                        | 0.969                                        | 0.930                                        | 0.912                                        |
| 2 $\theta$ range (°)                                                      | 3.716 to 53.464                              | 3.72 to 53.464                               | 3.714 to 53.466                              | 3.714 to 53.464                              |
| Reflns collected                                                          | 74413                                        | 74339                                        | 74644                                        | 74695                                        |
| Independent reflns ( <i>R</i> <sub>int</sub> )                            | 25197 [Rint = 0.0287, Rsigma = 0.0382]       | 25138 [Rint = 0.0296, Rsigma = 0.0393]       | 25189 [Rint = 0.0285, Rsigma = 0.0365]       | 25199 [Rint = 0.0285, Rsigma = 0.0367]       |
| L.S. parameters, <i>p</i>                                                 | 1548                                         | 1462                                         | 1529                                         | 1529                                         |
| No. of restraints, <i>r</i>                                               | 1701                                         | 1332                                         | 1600                                         | 1618                                         |
| <i>R</i> 1 ( <i>F</i> ) <sup>a</sup> <i>I</i> > 2.0 $\sigma$ ( <i>I</i> ) | 0.0586                                       | 0.0599                                       | 0.0578                                       | 0.0588                                       |
| <i>wR</i> 2( <i>F</i> <sup>2</sup> ), <sup>b</sup> all data               | 0.1594                                       | 0.1644                                       | 0.1655                                       | 0.1662                                       |
| <i>S</i> ( <i>F</i> <sup>2</sup> ), <sup>c</sup> all data                 | 1.025                                        | 1.024                                        | 1.042                                        | 1.034                                        |

<sup>a</sup>  $R1(F) = \sum(|F_o| - |F_c|) / \sum |F_o|$ ; [b]  $wR2(F^2) = [\sum w(F_o^2 - F_c^2)^2 / \sum w F_o^4]^{1/2}$ ; [c]  $S(F^2) = [\sum w(F_o^2 - F_c^2)^2 / (n + r - p)]^{1/2}$

**Table S4.** Crystallographic information for **I<sub>2</sub>@Cr<sub>8</sub>\_VT350K\_5-7**

|                                                                  | <b>I<sub>2</sub>@Cr<sub>8</sub>_VT350K_5</b> | <b>I<sub>2</sub>@Cr<sub>8</sub>_VT350K_6</b> | <b>I<sub>2</sub>@Cr<sub>8</sub>_VT350K_7</b> |
|------------------------------------------------------------------|----------------------------------------------|----------------------------------------------|----------------------------------------------|
| Crystal colour                                                   | Dark green                                   | Dark green                                   | Dark green                                   |
| Crystal size (mm)                                                | 0.4 × 0.1 × 0.1                              | 0.4 × 0.1 × 0.1                              | 0.4 × 0.1 × 0.1                              |
| Crystal system                                                   | monoclinic                                   | monoclinic                                   | monoclinic                                   |
| Space group, <i>Z</i>                                            | I2/a                                         | I2/a                                         | I2/a                                         |
| <i>a</i> (Å)                                                     | 34.6926(9)                                   | 34.6932(9)                                   | 34.6879(9)                                   |
| <i>b</i> (Å)                                                     | 16.5516(3)                                   | 16.5547(3)                                   | 16.5552(3)                                   |
| <i>c</i> (Å)                                                     | 44.5170(13)                                  | 44.5153(14)                                  | 44.5048(13)                                  |
| β (°)                                                            | 111.263(3)                                   | 111.259(3)                                   | 111.249(3)                                   |
| <i>V</i> (Å <sup>3</sup> )                                       | 23822.3(11)                                  | 23826.9(12)                                  | 23820.0(11)                                  |
| Density (Mg.m <sup>-3</sup> )                                    | 1.252                                        | 1.247                                        | 1.244                                        |
| Wavelength (Å)                                                   | MoKα (λ = 0.71073)                           | MoKα (λ = 0.71073)                           | MoKα (λ = 0.71073)                           |
| Temperature (K)                                                  | 200.0                                        | 200.0                                        | 200.0                                        |
| μ (mm <sup>-1</sup> )                                            | 0.896                                        | 0.880                                        | 0.869                                        |
| 2θ range (°)                                                     | 3.714 to 53.466                              | 3.714 to 53.466                              | 3.714 to 53.466                              |
| Reflns collected                                                 | 74717                                        | 74695                                        | 74708                                        |
| Independent reflns<br>( <i>R</i> <sub>int</sub> )                | 25182 [Rint = 0.0285,<br>Rsigma = 0.0365]    | 25190 [Rint = 0.0283,<br>Rsigma = 0.0367]    | 25181 [Rint = 0.0296,<br>Rsigma = 0.0383]    |
| L.S. parameters, <i>p</i>                                        | 1529                                         | 1529                                         | 1529                                         |
| No. of restraints, <i>r</i>                                      | 1600                                         | 1630                                         | 1612                                         |
| <i>R</i> 1 ( <i>F</i> ) <sup>a</sup> <i>I</i> > 2.0σ( <i>I</i> ) | 0.0582                                       | 0.0587                                       | 0.0580                                       |
| <i>wR</i> 2( <i>F</i> <sup>2</sup> ), <sup>b</sup> all data      | 0.1656                                       | 0.1672                                       | 0.1654                                       |
| <i>S</i> ( <i>F</i> <sup>2</sup> ), <sup>c</sup> all data        | 1.032                                        | 1.038                                        | 1.037                                        |

<sup>a</sup>  $R1(F) = \Sigma(|F_o| - |F_c|)/\Sigma|F_o|$ ; [b]  $wR2(F^2) = [\Sigma w(F_o^2 - F_c^2)^2/\Sigma wF_o^4]^{1/2}$ ; [c]  $S(F^2) = [\Sigma w(F_o^2 - F_c^2)^2/(n + r - p)]^{1/2}$

**Table S5.** Crystallographic information for **I<sub>2</sub>@Cr<sub>8</sub>\_VT400K\_1-4**

|                                                                  | <b>I<sub>2</sub>@Cr<sub>8</sub>_VT400K_1</b> | <b>I<sub>2</sub>@Cr<sub>8</sub>_VT400K_2</b> | <b>I<sub>2</sub>@Cr<sub>8</sub>_VT400K_3</b> | <b>I<sub>2</sub>@Cr<sub>8</sub>_VT400K_4</b> |
|------------------------------------------------------------------|----------------------------------------------|----------------------------------------------|----------------------------------------------|----------------------------------------------|
| Crystal colour                                                   | Dark green                                   | Dark green                                   | Dark green                                   | Dark green                                   |
| Crystal size (mm)                                                | 0.4 × 0.1 × 0.1                              | 0.4 × 0.1 × 0.1                              | 0.4 × 0.1 × 0.1                              | 0.4 × 0.1 × 0.1                              |
| Crystal system                                                   | monoclinic                                   | monoclinic                                   | monoclinic                                   | monoclinic                                   |
| Space group, <i>Z</i>                                            | I2/a                                         | I2/a                                         | I2/a                                         | I2/a                                         |
| <i>a</i> (Å)                                                     | 34.7173(10)                                  | 34.7020(10)                                  | 34.7258(10)                                  | 34.7238(10)                                  |
| <i>b</i> (Å)                                                     | 16.5607(5)                                   | 16.5610(5)                                   | 16.5727(5)                                   | 16.5752(5)                                   |
| <i>c</i> (Å)                                                     | 44.517(2)                                    | 44.493(2)                                    | 44.528(2)                                    | 44.522(2)                                    |
| β (°)                                                            | 111.303(5)                                   | 111.207(4)                                   | 111.190(4)                                   | 111.178(4)                                   |
| <i>V</i> (Å <sup>3</sup> )                                       | 23845.8(18)                                  | 23838.8(16)                                  | 23893.2(16)                                  | 23894.1(16)                                  |
| Density (Mg.m <sup>-3</sup> )                                    | 1.262                                        | 1.239                                        | 1.233                                        | 1.215                                        |
| Wavelength (Å)                                                   | MoKα (λ = 0.71073)                           |
| Temperature (K)                                                  | 200.03(10)                                   | 199.70(10)                                   | 199.73(10)                                   | 199.78(10)                                   |
| μ (mm <sup>-1</sup> )                                            | 0.937                                        | 0.851                                        | 0.840                                        | 0.773                                        |
| 2θ range (°)                                                     | 3.114 to 52.744                              | 3.114 to 52.744                              | 3.112 to 52.742                              | 3.112 to 52.744                              |
| Reflns collected                                                 | 67798                                        | 68594                                        | 68754                                        | 68754                                        |
| Independent reflns ( <i>R</i> <sub>int</sub> )                   | 24321 [Rint = 0.0645, Rsigma = 0.0859]       | 24213 [Rint = 0.0401, Rsigma = 0.0617]       | 24279 [Rint = 0.0418, Rsigma = 0.0631]       | 24279 [Rint = 0.0419, Rsigma = 0.0632]       |
| L.S. parameters, <i>p</i>                                        | 1555                                         | 1555                                         | 1536                                         | 1500                                         |
| No. of restraints, <i>r</i>                                      | 1431                                         | 1587                                         | 1623                                         | 1728                                         |
| <i>R</i> 1 ( <i>F</i> ) <sup>a</sup> <i>I</i> > 2.0σ( <i>I</i> ) | 0.0706                                       | 0.0661                                       | 0.0671                                       | 0.0703                                       |
| <i>wR</i> 2( <i>F</i> <sup>2</sup> ), <sup>b</sup> all data      | 0.1819                                       | 0.1641                                       | 0.1653                                       | 0.1879                                       |
| <i>S</i> ( <i>F</i> <sup>2</sup> ), <sup>c</sup> all data        | 1.017                                        | 1.011                                        | 1.013                                        | 1.013                                        |

<sup>a</sup>  $R1(F) = \sum(|F_o| - |F_c|) / \sum |F_o|$ ; [b]  $wR2(F^2) = [\sum w(F_o^2 - F_c^2)^2 / \sum wF_o^4]^{1/2}$ ; [c]  $S(F^2) = [\sum w(F_o^2 - F_c^2)^2 / (n + r - p)]^{1/2}$

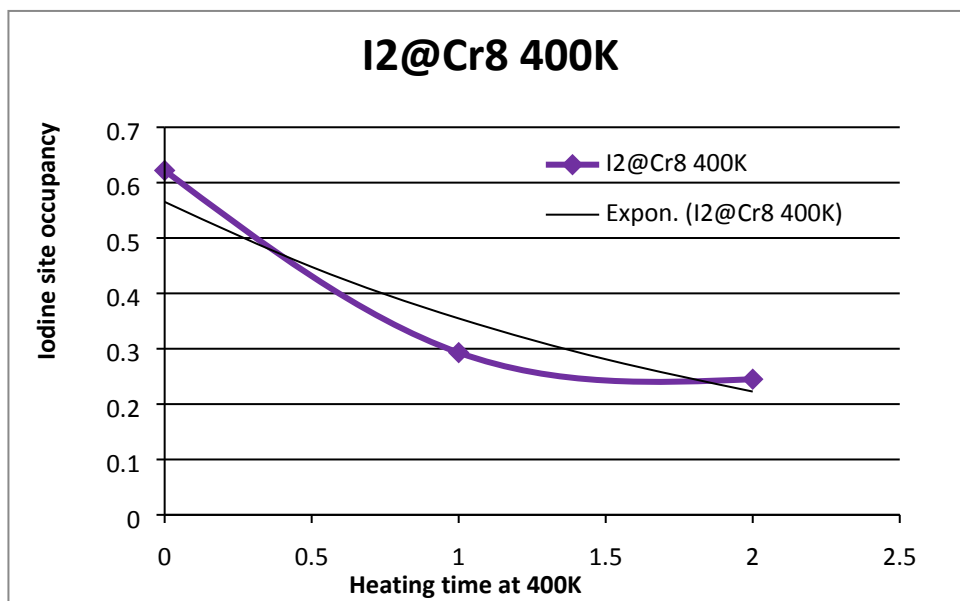

**Figure S8** - Site occupancy of iodine molecules inside Cr<sub>8</sub> vs heating time at 400K with exponential regression.

From the exponential regression with extract the reaction rate coefficient is equal to 0.466 h<sup>-1</sup>. Having two release rate coefficients at two different temperatures (350 and 400K) we can calculate an activation energy with the following equation:

$$\ln(k_1/k_2) = (1/T_2 - 1/T_1) \cdot E_a/R$$

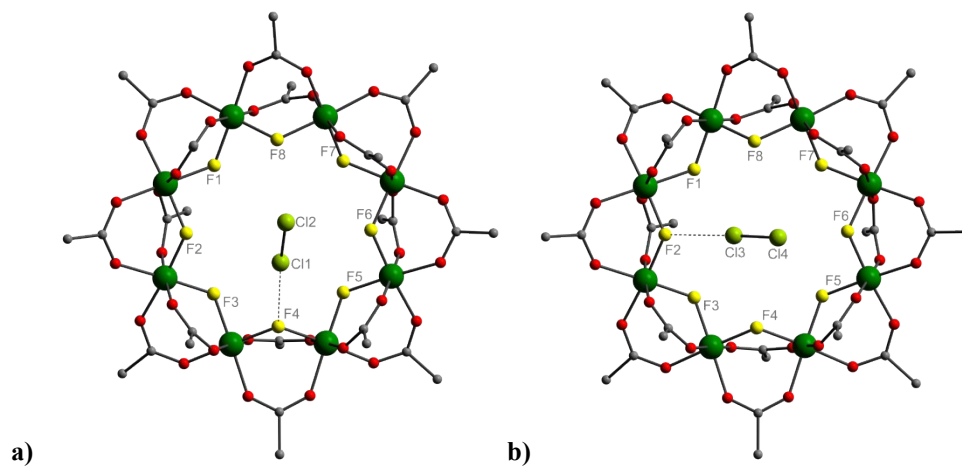

**Figure S8.** a) First component of the Chlorine disorder inside the cavity of **1**, with 0.419(5) occupancy and b) is the other position of the Chlorine disorder with 0.324(5) occupancy.

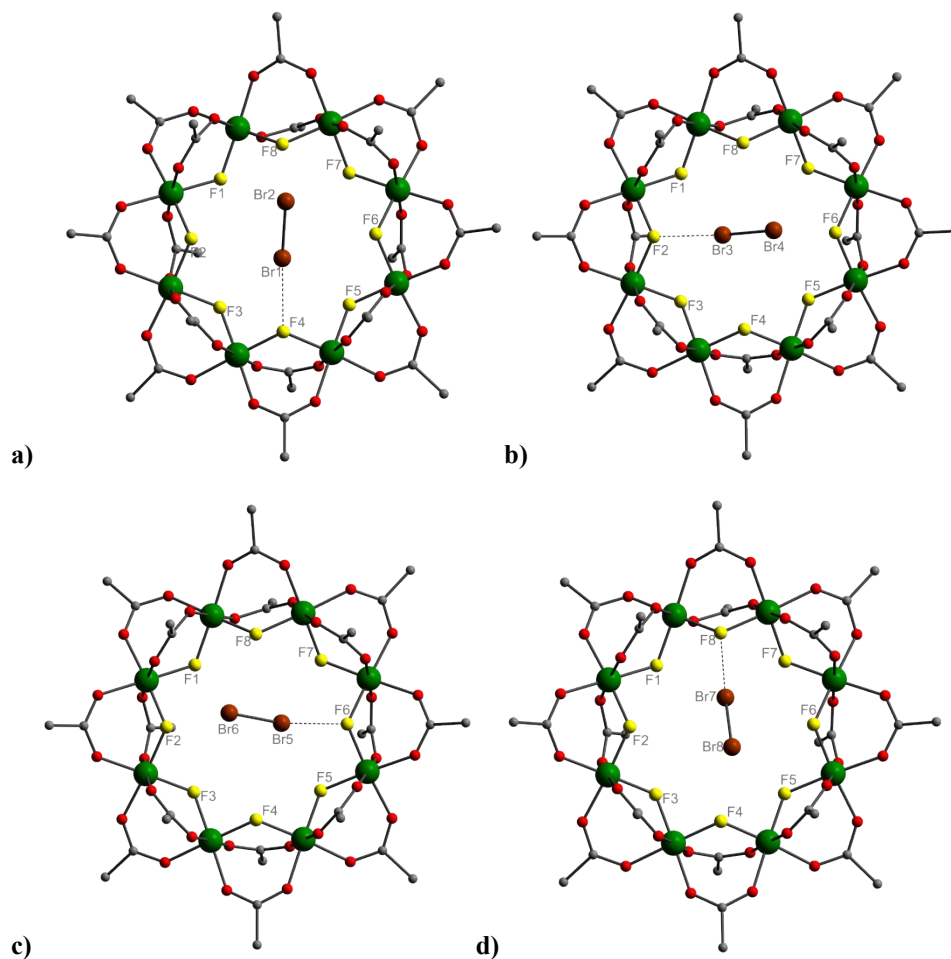

**Figure S9.** a) First component of the Bromine disorder inside the cavity of **Cr<sub>8</sub>**, with 0.3901(18) occupancy, b) is the second component of the Bromine disorder with 0.2829(18) occupancy, c) is the third component of the disorder with 0.0673(18) occupancy and d) is the fourth component of the disorder with 0.0614(18) occupancy.



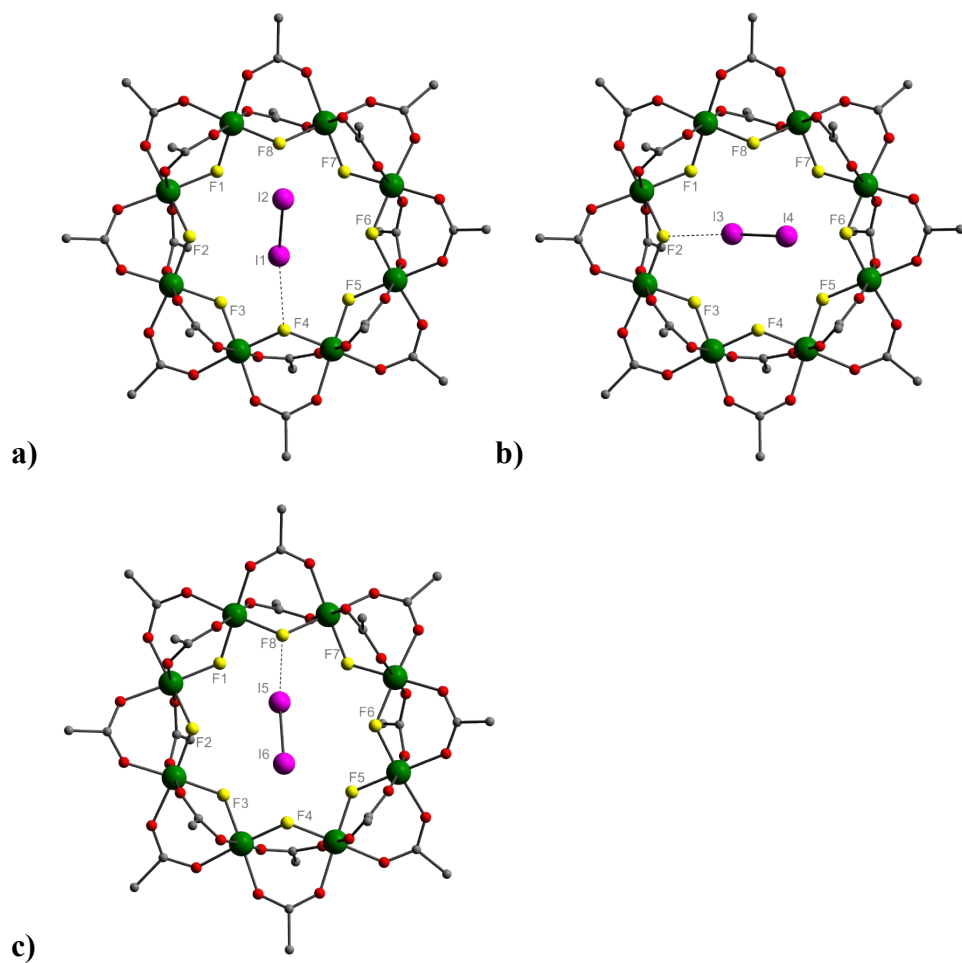

**Figure S10.** a) First component of the Iodine disorder inside the cavity of  $\text{Cr}_8$ , with 0.2143(11) occupancy, b) is the second component of the Iodine disorder with 0.1245(12) occupancy and c) is the third component of the disorder with 0.0404(11) occupancy.

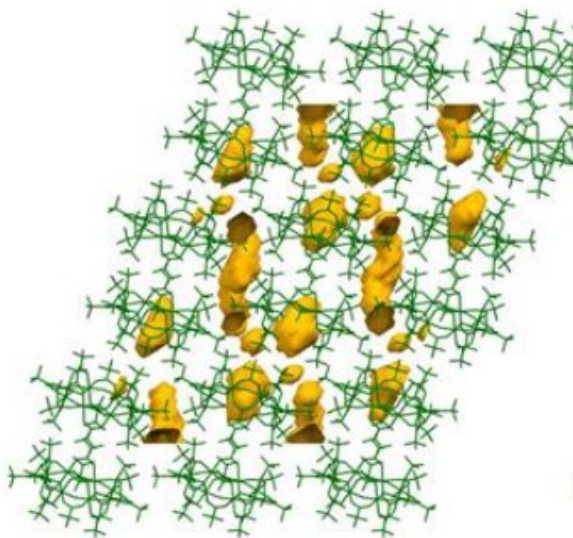

**Figure S11.** [010] views of crystal packing of  $\text{Cr}_8$ . Molecules of  $\text{Cr}_8$  are drawn in green and capped sticks. Hydrogens were omitted for clarity.

## S6. References

1. I. J. Vitórica-Yrezábal, D. F. Sava, G. A. Timco, M. S. Brown, M. Savage, H. G. W. Godfrey, F. Moreau, M. Schröder, F. Siperstein, L. Brammer, S. Yang, M. P. Attfield, J. J. W. McDouall and R. E. P. Winpenny, *Angewandte Chemie International Edition*, 2017, **56**, 5527-5530.
2. A. Anderson and T. S. Sun, *Chemical Physics Letters*, 1970, **6**, 611-616.
3. H. Stammreich, *Physical Review*, 1950, **78**, 79-80.
4. W. Kiefer and H. J. Bernstein, *Journal of Raman Spectroscopy*, 1973, **1**, 417-431.
5. O. V. Dolomanov, L. J. Bourhis, R. J. Gildea, J. A. K. Howard and H. Puschmann, *Journal of Applied Crystallography*, 2009, **42**, 339-341.
6. G. Sheldrick, *Acta Crystallographica Section C*, 2015, **71**, 3-8.
